# Supplementary material for: Effect and mechanism of oritavancin on hIAPP amyloid formation
Source: Royal Society of Chemistry journal article supplement (doi:10.1039/d4tb02215g), 2024-12-28
Supplement: d4tb02215g1.pdf [file d4tb02215g1.pdf]

**Supplementary information**

**Effect and Mechanism of Oritavancin on hIAPP Amyloid Formation**

Sheng-Nan Wang<sup>1</sup>, Xin-Yu Li<sup>1</sup>, Zhong-Xia Lu<sup>1</sup>, Lu-Xin Liu<sup>1</sup>, Xuan-Ping Xu<sup>1</sup>, Wen-Gong Yu<sup>1,2,3</sup>, Xin-Zhi Lu<sup>1\*</sup>

<sup>1</sup>Key Laboratory of Marine Drugs, Ministry of Education; School of Medicine and Pharmacy, Ocean University of China, 5 Yushan Road, Qingdao 266003, China.

<sup>2</sup>Laboratory for Marine Drugs and Bioproducts of Qingdao National Laboratory for Marine Science and Technology, Qingdao 266200, China.

<sup>3</sup>Key Laboratory of Glycoscience & Glycotechnology of Shandong Province, Qingdao 266003, China

\*To whom correspondence should be addressed: Tel/Fax: +86-53282032067; e-mail: luxinzhi@ouc.edu.cn (X.-Z. Lu)

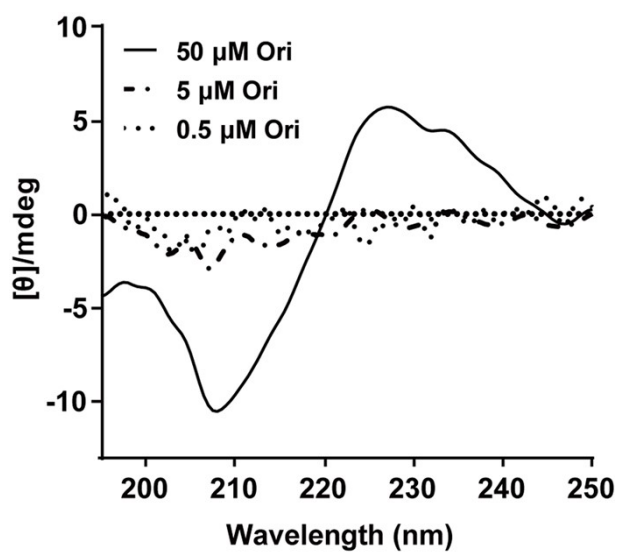

Fig. S1 CD spectra of different concentrations of Ori at 195- 250 nm.

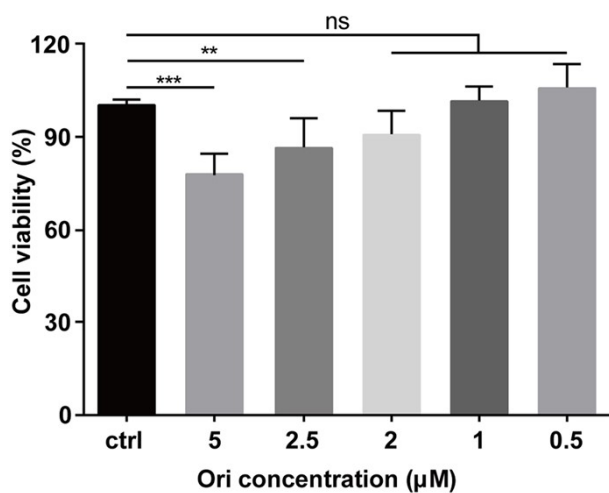

Fig. S2 The cytotoxic effect of Ori (0.5-5 μM) on cell viability in NIT-1 cells for 24 h. Data are shown as means ± SD, n = 3 in normal distribution (\*p<0.05; \*\*p< 0.01; \*\*\*p<0.001).

Table S1. Result of Vina docking parameters for hIAPP + Ori.

| mode | affinity (kcal mol <sup>-1</sup> ) |
|------|------------------------------------|
| 1    | -6.3                               |
| 2    | -6.2                               |
| 3    | -6.2                               |
| 4    | -6.2                               |
| 5    | -6.2                               |
| 6    | -6.1                               |
| 7    | -6.0                               |
| 8    | -5.8                               |
| 9    | -5.8                               |

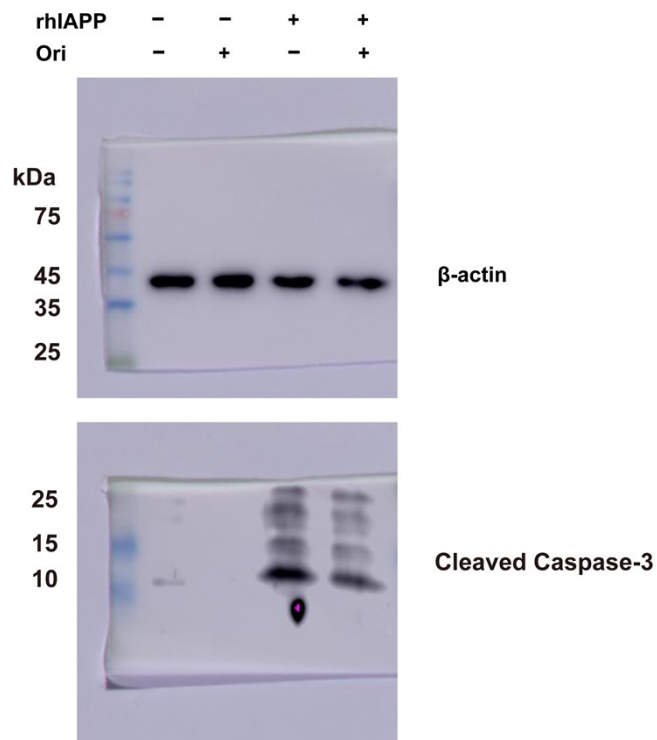

Fig. S3 The original scanned image of the western blot for  $\beta$ -actin and Cleaved Caspase-3 in Figure 6D.

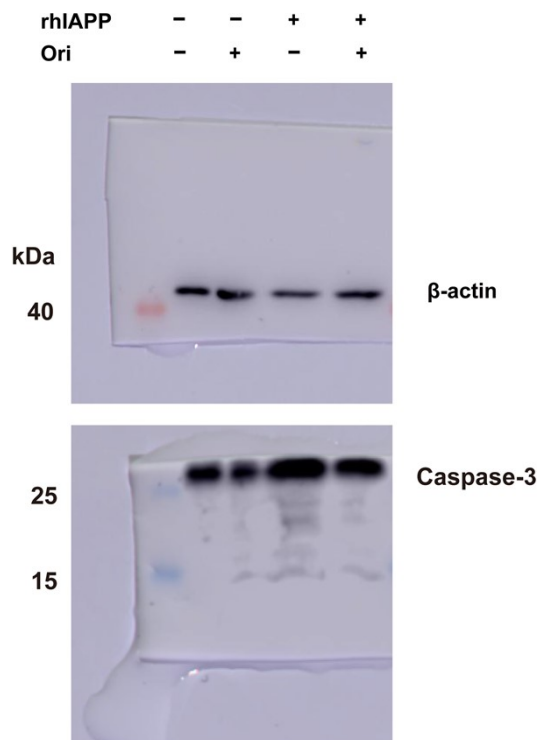

Fig. S4 The original scanned image of the western blot for  $\beta$ -actin and Caspase-3 in Figure 6D.

Table S2. Comparison of the inhibition efficiencies with Ori and several reported compounds.

| Compounds                  | Max concentration |                            | Min concentration |                  | Ref       |
|----------------------------|-------------------|----------------------------|-------------------|------------------|-----------|
|                            | Molar ratio*      | Inhibition ratio           | Molar ratio*      | Inhibition ratio |           |
| Cloridarol                 | 1:5               | 55.6%                      | 1:1               | 17.3%            | [1]       |
| Genistein                  | 1:5               | 63.4%                      | 1:1               | 52.1%            | [2]       |
| Tanshinones 1              | 1:1               | ~70%                       | 1:0.25            | ~63%             | [3]       |
| Tanshinones 2              | 1:1               | ~69%                       | 1:0.25            | ~60%             | [3]       |
| Silybin A                  | 1:0.8             | ~50%                       | 1:0.1             | N/A              | [4]       |
| Silybin B                  | 1:0.8             | ~60%                       | 1:0.1             | No effect        | [4]       |
| Flavonoids B               | 1:4               | 92%                        | 1:1               | N/A              | [5]       |
| Flavonoids Ba              | 1:4               | 71%                        | 1:1               | N/A              | [5]       |
| Flavonoids W               | 1:4               | 40%                        | 1:1               | N/A              | [5]       |
| Flavonoids O               | 1:4               | 42%                        | 1:1               | N/A              | [5]       |
| Salvianolic acid B         | 1:5               | Almost complete inhibition | 1:1               | 68%              | [6]       |
| Isoquinoline alkaloids CHE | 1:5               | 84.4%                      | 1:1               | 54.4%            | [7]       |
| Bleomycin                  | 1:5               | N/A                        | 1:1               | N/A              | [8]       |
| Tetracycline derivatives   | 1:5               | N/A                        | 1:1               | N/A              | [9]       |
| Teicoplanin                | 1:1               | ~71%                       | 1:0.5             | No effect        | This work |
| Dalbavancin                | 1:1               | ~73%                       | 1:0.5             | No effect        | This work |
| Oritavancin                | 1:1               | Almost complete inhibition | 1:0.01            | 36%              | This work |

\*: Molar ratio=hIAPP/compounds

## Reference

- [1] Tang, Y., et al., *Repurposing a Cardiovascular Disease Drug of Cloridarol as hIAPP Inhibitor*. ACS Chemical Neuroscience, 2021. **12**(8): p. 1419-1427.
- [2] Ren, B., et al., *Genistein: A Dual Inhibitor of Both Amyloid  $\beta$  and Human Islet Amylin Peptides*. ACS Chemical Neuroscience, 2018. **9**(5): p. 1215-1224.
- [3] Ren, B., et al., *Tanshinones inhibit hIAPP aggregation, disaggregate preformed hIAPP fibrils, and protect cultured cells*. Journal of Materials Chemistry B, 2018. **6**(1): p. 56-67.
- [4] García-Viñuales, S., et al., *Silybins inhibit human IAPP amyloid growth and toxicity through stereospecific interactions*. Biochimica et Biophysica Acta (BBA) - Proteins and Proteomics, 2022. **1870**(5).
- [5] Wang, Y., et al., *Inhibitory activities of flavonoids from *Scutellaria baicalensis* Georgi on amyloid aggregation related to type 2 diabetes and the possible structural requirements for polyphenol in inhibiting the nucleation phase of hIAPP aggregation*. International Journal of Biological

- Macromolecules, 2022. **215**: p. 531-540.
- [6] Cheng, B., et al., *Salvianolic acid B inhibits the amyloid formation of human islet amyloid polypeptide and protects pancreatic beta-cells against cytotoxicity*. Proteins: Structure, Function, and Bioinformatics, 2012. **81**(4): p. 613-621.
- [7] Wang, Y., et al., *Exploration of Isoquinoline Alkaloids as Potential Inhibitors against Human Islet Amyloid Polypeptide*. ACS Chemical Neuroscience, 2022. **13**(14): p. 2164-2175.
- [8] Kumari, A., et al., *Bleomycin modulates amyloid aggregation in  $\beta$ -amyloid and hIAPP*. RSC Advances, 2020. **10**(43): p. 25929-25946.
- [9] Xu, J., et al., *Tetracycline derivatives resist the assembly behavior of human islet amyloid polypeptide*. Biochimie, 2020. **174**: p. 95-106.
